# Supplementary material for: Efficient synthesis of 2,5-dihydroxymethylfuran and 2,5-dimethylfuran from 5-hydroxymethylfurfural using mineral-derived Cu catalysts as versatile catalysts
Source: Royal Society of Chemistry journal article supplement (doi:10.1039/c5cy00700c), 2015-01-01
Supplement: c5cy00700c1.pdf [file c5cy00700c1.pdf]

1 **Table S1** Catalytic performance of reduced CuZn-2, unreduced CuZn-2 and  
2 reduced CuZn-inf for DHMF production. <sup>a</sup>

| Catalyst         | P (MPa) | T (°C) | t (h) | HMF conversion (%) |
|------------------|---------|--------|-------|--------------------|
| Reduced CuZn-2   | 1.5     | 100    | 1     | 83.5               |
| Reduced CuZn-inf | 1.5     | 100    | 1     | 16.3               |
| Unreduced CuZn-2 | 1.5     | 100    | 1     | 0.7                |

3 <sup>a</sup> Conditions: HMF 1.5 g, catalyst 0.5 g, 1,4-dioxane 35 ml.

4

5 We performed model tests over reduced CuZn-2, unreduced CuZn-2 and  
6 reduced CuZn-inf for DHMF production at 100 °C (**Table S1**). The reduced  
7 CuZn-2 catalyst (composed of highly dispersed metallic Cu and ZnO sites)  
8 showed a HMF conversion of 83.5%; the reduced CuZn-inf catalyst (composed  
9 of metallic Cu sites) showed a conversion of 16.3%. In contrast, the unreduced  
10 CuZn-2 (mainly composed of ZnO and unreduced CuO sites) give a conversion  
11 of 0.7%. The results revealed that bare ZnO can hardly catalyze HMF  
12 hydrogenation to DHMF at the conditions.

13

14

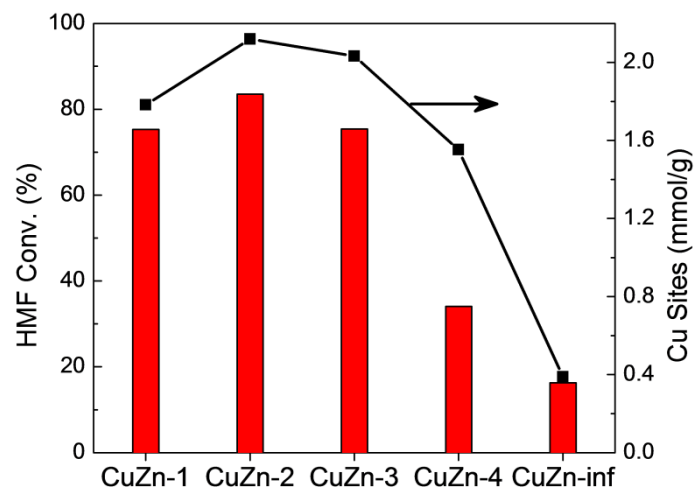

1

2 **Figure S1.** Catalytic performance of CuZn-x catalysts within 1 h and the  
3 correlation with metallic Cu specific areas (100 °C, 1.5 MPa H<sub>2</sub>, HMF 1.5 g,  
4 catalyst 0.5 g).

5

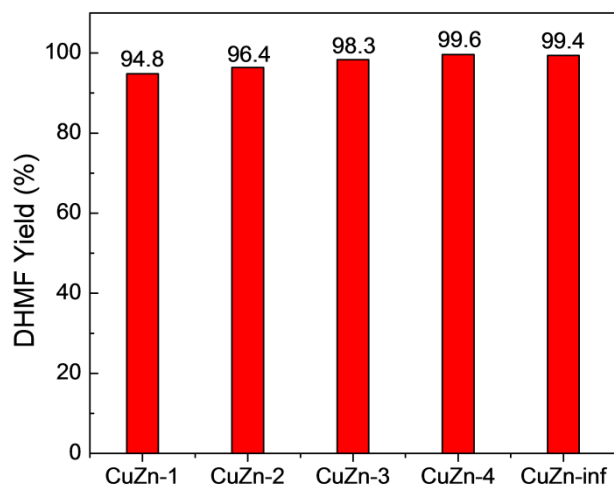

1

2 **Figure S2.** Catalytic performance of CuZn-x catalysts for 20 h (100 °C, 1.5 MPa  
3 H<sub>2</sub>, HMF 1.5 g, catalyst 0.5 g).

4

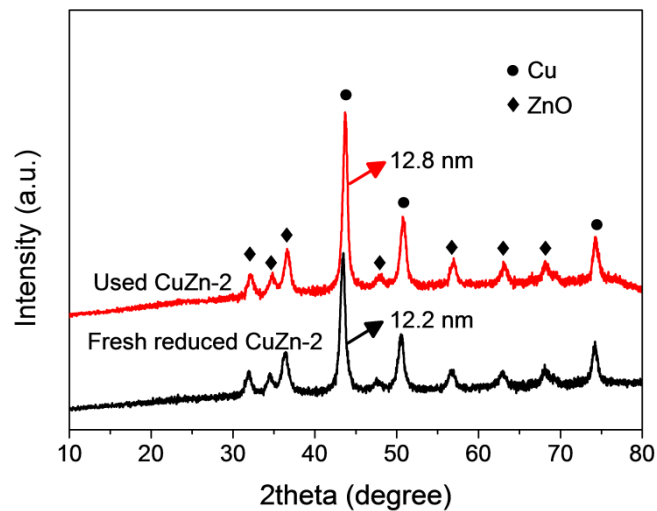

1

2 **Figure S3.** XRD spectra of fresh reduced and used CuZn-2 catalysts (Metallic  
3 Cu particle sizes were calculated using Scherrer Equation).

4
